# Supplementary material for: Defensive Metabolites from Antarctic Invertebrates: Does Energetic Content Interfere with Feeding Repellence?
Source: MDPI journal article supplement (doi:10.3390/md12063770), 2014-06-24
Supplement: s1 [file s1]

## Supplementary Information

**Figure S1.** Diagram showing the repellent bioactivities of the target metabolites in 45 feeding preference experiments performed with the amphipod *Cheirimedon femoratus*. Five types of compounds (**1–12**) were tested at three different concentrations, and were incorporated into three assay diets of distinct energetic values (5 **Comp** × 3 [**Conc**] × 3 diets = 45 bioassays). The three types of artificially prepared diets (feeding alginate pearls) contained 200, 100 and 50 mg of PhytoPlan® feeding stimulant (and a compensating dry weight content of sand of: 0, 100 and 150 mg, respectively), and are represented along the X-axis with different shaded areas. On the Y-axis, assay testing concentrations of metabolites (**1–12**) are expressed respect to the total dry weight: 10, 5 and 2.5 mg g<sup>-1</sup> DW<sub>TOTAL</sub>. These values correspond to the quantities of compounds added in the treatment foods respectively (2, 1 and 0.5 mg **Comp**). The five compound types are symbolized with icons: “Wax”—circle: Wax esters (**1–2**); “Mer”—triangle: meridianins A–G (**3–9**); “Ross”—rombe: rossinone B (**10**); “Chol”—star: 5α(*H*)-cholestan-3-one (**11**) and “Glass”—moon: glassposinsine (**12**). Only active results of feeding repellency for each metabolite in the bioassays, at a certain [**Conc**] and diet, are shown in the graphic with the corresponding compound icons. Repellent activities correspond to significant lower ingestion rates in treatment feeding pearls (compound-containing) respect to paired control pearls (compound-free), analyzed with Wilcoxon Exact Tests: Active in feeding repellence ( $p < 0.05$  \*); Inactive ( $p \geq 0.05$  n.s.).

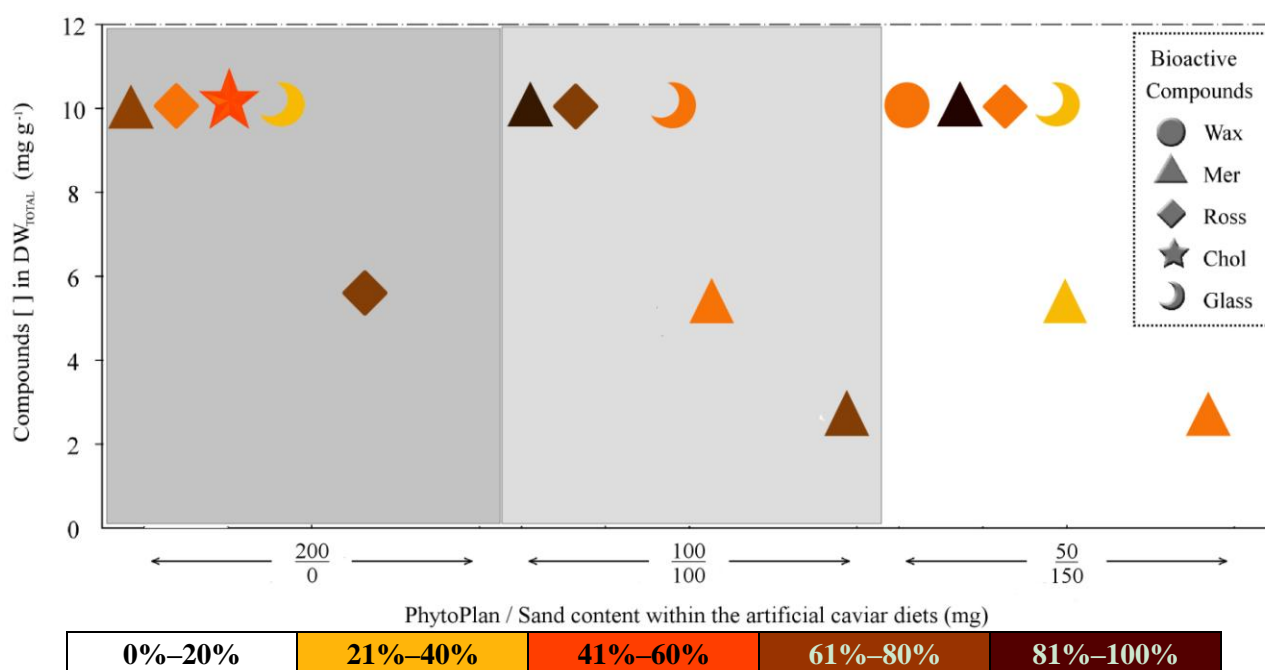

\* Color codes corresponding to the percentage of the average difference of ingestion rate between Control vs. Treatment food pearls for the 15 replicate tests in each experiment.

**Table S1.** Example of contingency tables  $3 \times 3$  constructed with the categorical variables Assay diet, “Diet”, and Compound concentration, “[Conc]” were confronted, for each of the five compound types **1–12** assessed in the feeding preference experiments with *Cheirimedon femoratus* (Wax esters **1–2**, Meridianins **3–9**, Rossinone **10**,  $5\alpha(H)$ -cholestan-3-one **11**, Glassponsine **12**). Values in the table were calculated as:  $\partial_{\text{PhytoPlan:}[Conc]} = \% (((\text{Control ingestion} - \text{Treatment ingestion})/n)/\mu \text{ Control ingestion})$ ;  $n = 15$  replicate tests.

| <b>Diet</b><br><b>[Conc] *</b> | <b>200 mg Phyto</b>  | <b>100 mg Phyto</b>  | <b>50 mg Phyto</b>  |
|--------------------------------|----------------------|----------------------|---------------------|
| 10 mg g <sup>-1</sup>          | $\partial_{10:200}$  | $\partial_{10:100}$  | $\partial_{10:50}$  |
| 5 mg g <sup>-1</sup>           | $\partial_{5:200}$   | $\partial_{5:100}$   | $\partial_{5:50}$   |
| 2.5 mg g <sup>-1</sup>         | $\partial_{2.5:200}$ | $\partial_{2.5:100}$ | $\partial_{2.5:50}$ |

\* **Comp:** Wax esters **1–2**; Meridianins **3–9**; Rossinone **10**; Cholestan**11**; Glassponsine **12**.

$$\partial_{\text{PhytoPlan:}[Conc]} = \% \frac{\frac{\text{Control ingestion} - \text{Treatment ingestion}}{n}}{\mu \text{ Control ingestion}}; \text{ where } n = 15 \text{ replicates}$$

© 2014 by the authors; licensee MDPI, Basel, Switzerland. This article is an open access article distributed under the terms and conditions of the Creative Commons Attribution license (<http://creativecommons.org/licenses/by/3.0/>).
